# Supplementary material for: Sein–EY marvels: effortless elegance in crafting flexible film photocatalysts for formic acid production from CO2 and cyclization of thioamides in the air's embrace
Source: Royal Society of Chemistry journal article supplement (doi:10.1039/d4nj00531g), 2024-01-01
Supplement: d4nj00531g1.pdf [file d4nj00531g1.pdf]

## Electronic Supporting Information

### **Se<sub>in</sub>-EY Marvels: Effortless Elegance in Crafting Flexible Film Photocatalysts for Formic Acid Production from CO<sub>2</sub> and Cyclization of Thioamides in the Air's Embrace**

Rehana Shahin,<sup>a</sup> Rajesh K. Yadav,<sup>a\*</sup> Rajesh K. Verma,<sup>b\*</sup> Chandani Singh,<sup>c</sup> Satyam Singh,<sup>a</sup> Rajat Singhal,<sup>d</sup> Navneet K. Gupta,<sup>e</sup> Jin OoK Baeg<sup>c\*</sup> Gamal A. El-Hiti<sup>e</sup>, Krishna Kumar Yadav<sup>f</sup>

<sup>a\*</sup> Department of Chemistry and Environmental Science, Madan Mohan Malaviya University of Technology, Gorakhpur, U.P. 273010, India. \*Email: rajeshkr\_yadav2003@yahoo.co.in

<sup>b\*</sup> Department of Mechanical Engineering, Harcourt Butler Technical University Kanpur 208002, India. Email: rkvm@hbtu.ac.in

<sup>c\*</sup>Korea Research Institute of Chemical Technology, N3, 141 Gajeong-ro, Yuseong-gu, Daejeon 34114, Korea South Korea. \*Email: jobaeg@kriect.re.kr

<sup>d</sup>Centre for Sustainable Technologies, Indian Institute of Science, Gulmohar Marg, Mathikere, 560012 Bengaluru, India.

<sup>e</sup>Department of Optometry, College of Applied, Medical Sciences, King Saud University, Riyadh 11433, Saudi Arabia

<sup>f</sup>Faculty of Science and Technology, Madhyanchal Professional University, Ratibad, Bhopal, 462044, India, and Environmental and Atmospheric Sciences Research Group, Scientific Research Center, Al-Ayen University, Thi-Qar, Nasiriyah, 64001, Iraq

## 1. Instruments and Measurements

UV-Visible (UV-Visible) spectroscopy were recorded on Shimadzu UV-1800 spectrometer. Fourier transform infrared spectroscopy (FTIR) spectroscopy were obtained on a Nicole 6700 (made by Thermo Scientific, USA) spectrometer using the KBr pellet support. Powder X-ray diffractometer (Bruker, AXS D8 Advance X-ray diffractometer and Cu  $K\alpha$  radiation) was used. Scanning electron microscope (SEM) images were obtained on a FET Phillips instrument [Model No. 200k VLAB6, (FEL TECNAI G2-20S- Twin)] operated at ( $\lambda = 0.15406 \text{ nm}$ ) 200 kv. Transmission electron microscope (TEM) images were obtained on a FET Phillips instrument [Model No. 200k VLAB6, (FEL TECNAI G2- S3 20S-Twin)] operated at 200 kV. Cyclic Voltammetry, Tafel plot, EIS were performed on (CHI608E, 220V) instrument. TGA were recorded on (TGA) was carried out on TA Instruments Q500 instrument over a range of 25-800 °C with a heating rate of 5°C min<sup>-1</sup>. <sup>1</sup>H NMR spectra was recorded on a Bruker AVANCE II + 300 MHz spectrometer with tetramethylsilane (TMS;  $\delta = 0$ ) as internal standard. HPLC was recorded on LC-20AP, SHIMADZU. XPS (X-ray photon electron spectroscopy) were recorded on Escalab 250Xi, Thermo Fisher, America. GC-MS spectra recorded on Agilent 6890N gas chromatograph.

## 2. Synthesis of Rhodium complex $[\text{Rh} = \text{Cp}^*\text{Rh}(\text{bpy})\text{Cl}]^+$

First, 5 mL of distilled methanol was used to dissolve 25 mg of Rh compound ( $[\text{Rh}(\text{C}_5\text{Me}_5)_2\text{Cl}_2]$ ) in a  $\text{N}_2$  environment. As a result, 13 mg of 2,2'-bipyridyl (2 eq.) was added to the above solution and stirred at room temperature in the dark. A yellow precipitate formed after adding diethyl ether. In the final step, the obtained product is filtered and dried at room temperature under  $\text{N}_2$  environment. For the synthesis of the Rhodium complex (Rh), the described procedure was followed.<sup>1</sup>

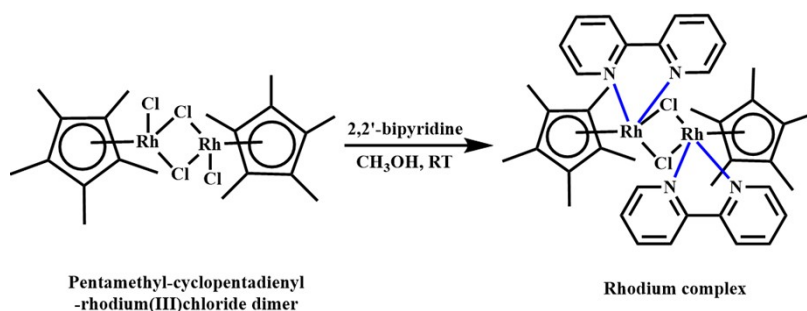

**Fig. S1** Synthesis of Rhodium complex.

### 3. Preparation of flexible film of $\text{Se}_{\text{in}}\text{-EY}$ photocatalyst

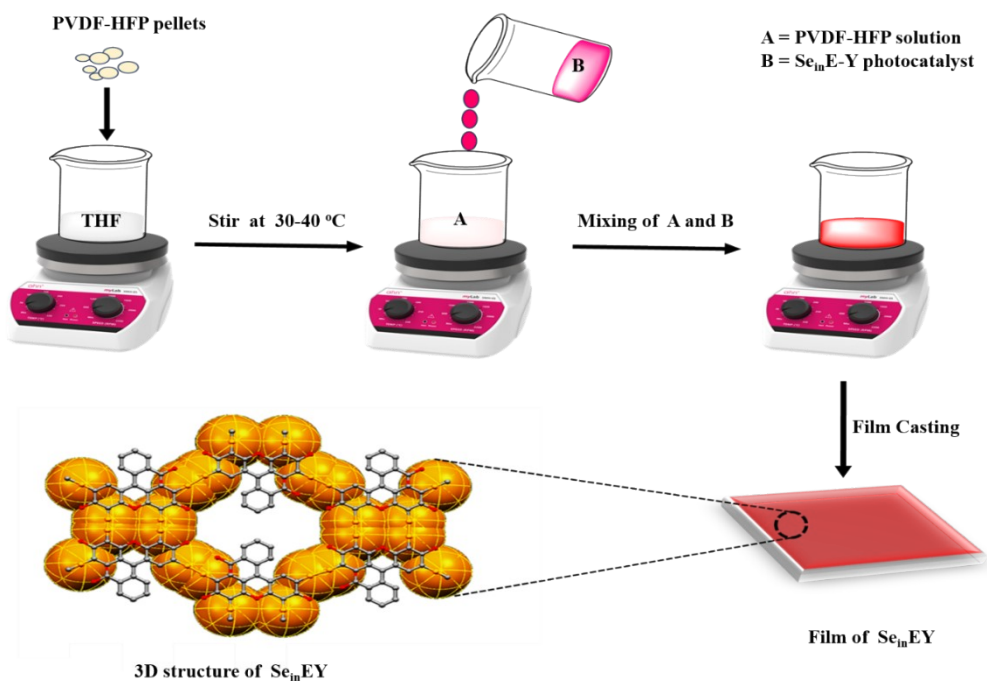

**Fig. S2** Diagrammatic illustration for the Synthesis of flexible film of  $\text{Se}_{\text{in}}\text{-EY}$  photocatalyst.

Initially, in the tetrahydrofuran (THF) solvent, (vinylidene fluoride-co-hexafluoropropylene) polymer pellets were added. After 2-3 hours, the PVDF-PHF pellets get dissolved into the tetrahydrofuran (THF) to become the solvent thick. In the meantime,  $\text{Se}_{\text{in}}\text{-EY}$  photocatalyst dissolve in chloroform to make solution B. This solution B we then added into the earlier prepared thick solution A and stir for a minute. Now, when these two gets added together formed a layer. Over the period, the chloroform was gradually evaporated leaving behind the  $\text{Se}_{\text{in}}\text{-EY}$  photocatalyst to settle down with the dissolved polymer. It was converted into a film after being dried. Eventually, we took out the flexible film of  $\text{Se}_{\text{in}}\text{-EY}$  photocatalyst.

#### 4. Elemental mapping of EY along with SEM

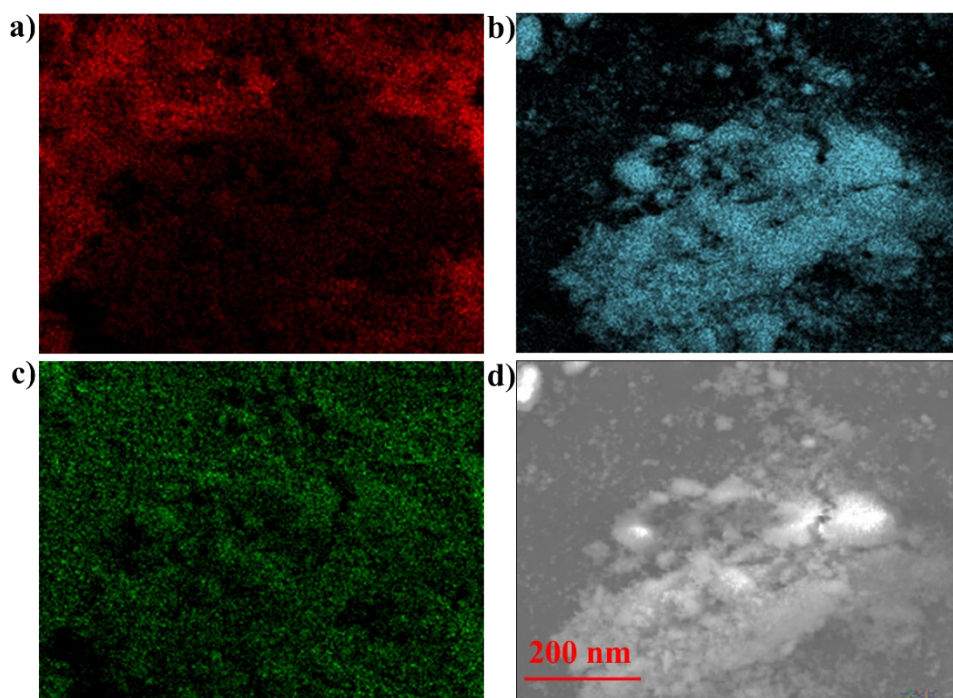

**Fig S3.** Elemental mapping images of (a) Carbon of EY, (b) Bromine of EY, (c) Oxygen of EY, and (d) SEM image of EY monomer.

#### 5. Cyclic stability and reusability test

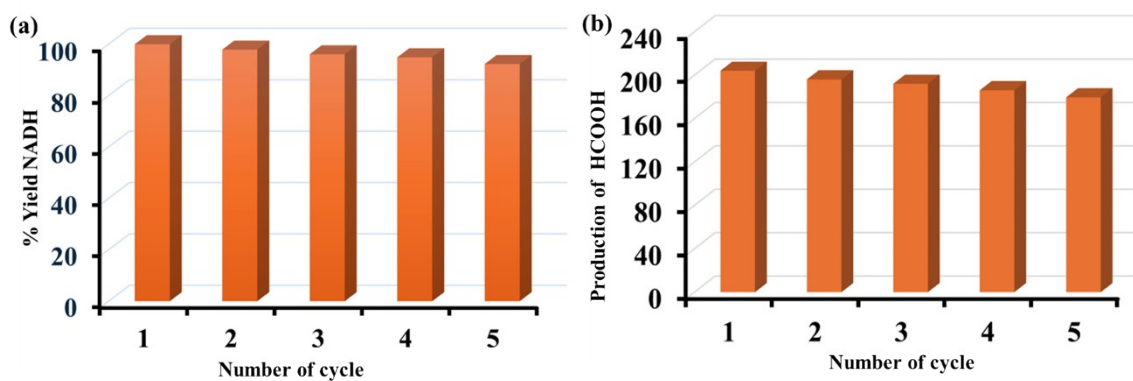

**Fig. S4** Five times cyclic stability experiments for 1,4-NADH photo regeneration and formic acid (HCOOH) production from CO<sub>2</sub>. The reaction medium contains (a) β-NAD<sup>+</sup> (1.24 μM), AsA (1.24 μM), Rh (0.62 μM), and the Se<sub>in</sub>-EY (1x1cm<sup>2</sup>) film photocatalyst in 3.1 mL NPB (100 mM, pH 7.0). (b) Formic acid production from CO<sub>2</sub> under solar light [β-NAD<sup>+</sup> (1.24 μM),

AsA (1.24  $\mu\text{M}$ ), Rh (0.62  $\mu\text{M}$ ), and the  $\text{Se}_{\text{in}}\text{-EY}$  ( $1 \times 1 \text{ cm}^2$ ) film photocatalyst in 3.1 mL NPB (100 mM, pH 7.0), FDH (3 units).

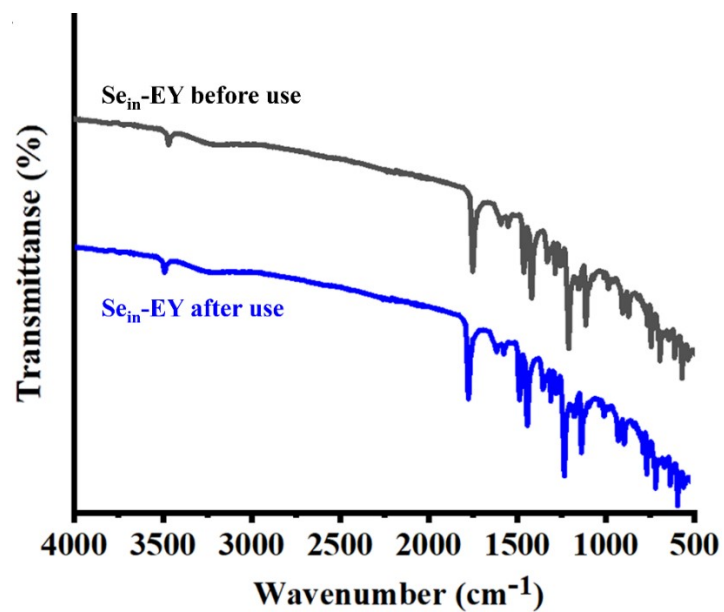

**Fig.S5** The reusability and chemical stability of the  $\text{Se}_{\text{in}}\text{-EY}$  photocatalyst through FT-IR spectra.

**7. A Comparative study of reported literature with Se<sub>in</sub>-EY photocatalyst for NADH regeneration and formic acid synthesis from CO<sub>2</sub>**

| S.N. | Photocatalyst                                                  | Method          | Time | %1,4-NADH | Formic acid (μM) | Reference |
|------|----------------------------------------------------------------|-----------------|------|-----------|------------------|-----------|
| 1.   | Hierarchical Cu pillar electrode                               | Electrochemical | 6h   | ---       | 13.17            | 4         |
| 2.   | COF-367-Coll                                                   | Photochemical   | 8h   | ---       | 3.89             | 5         |
| 3.   | RB/Si-NaYF <sub>4</sub> : Yb,Er                                | Photochemical   | 1h   | 18.86%    | ---              | 6         |
| 4.   | W <sub>2</sub> Fe <sub>4</sub> Ta <sub>2</sub> O <sub>17</sub> | Photochemical   | 14h  | 60        | ---              | 7         |
| 5.   | CdTe nanocrystals                                              | Photochemical   | 2h   | 55        | ---              | 8         |
| 6.   | CaLa <sub>4</sub> Ti <sub>4</sub> O <sub>15</sub>              | Electrochemical | 1h   | ---       | 1.8              | 9         |
| 7.   | RuP/C <sub>3</sub> N <sub>4</sub>                              | Photochemical   | 1h   | ---       | 8.8              | 10        |
| 8.   | PANi-ClFDH                                                     | Electrochemical | 1h   | ---       | 1.42             | 11        |
| 9.   | Fmoc-FF/g-CN                                                   | Photochemical   | 3h   | 62.7      | ---              | 12        |
| 10.  | Se <sub>in</sub> -EY                                           | Photochemical   | 2 h  | 83.56%    | 204              | Our work  |

**Table S1:** Comparative studies for NADH photoregeneration and formic acid production from CO<sub>2</sub>.

### 8. Reusability test for Se<sub>in</sub>-EY film photocatalyst for aerobic oxidative cyclization

The reusability of the Se<sub>in</sub>-EY film photocatalyst was scrutinized by subjecting it to several cycles for the aerobic oxidative cyclization under solar light irradiation. As shown in table 1 (entry 2), in evaluation to the first cycle where in the Se<sub>in</sub>-EY film photocatalyst carried out 98.6% (100%) of aerobic cyclization of thioamides, and 87.5% (88.9%) was obtained in the fifth cycle (see in ESI on Fig. S6). The photocatalytic effectiveness of Se<sub>in</sub>-EY film photocatalyst remains consistent after multiple recycles, indicating its great stability. The obtain result show that the excellent reusability and stability of Se<sub>in</sub>-EY film photocatalyst. The aerobic oxidative cyclization in presence of Se<sub>in</sub>-EY photocatalyst gives high yield product in less time as compared to other reported catalyst.<sup>1,2</sup>

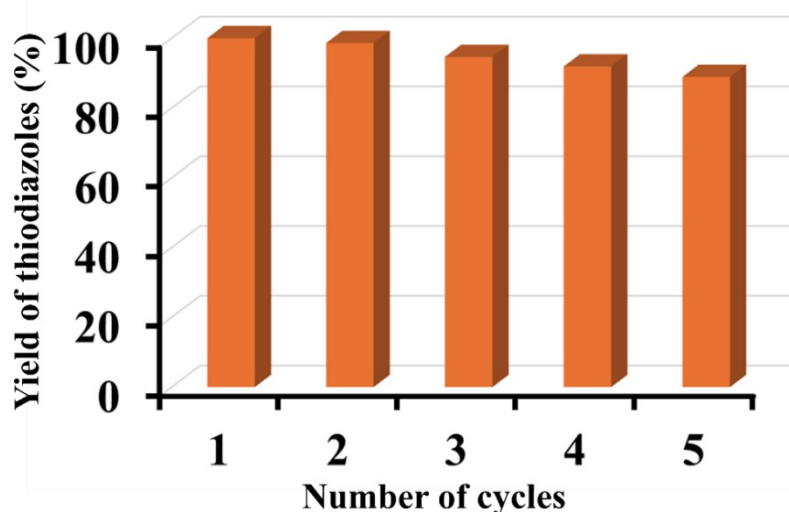

**Fig. S6** Reusability test of Se<sub>in</sub>-EY photocatalyst for thiobenzadiazoles synthesis by aerobic oxidative cyclization.

### 9. High performance liquid chromatography (HPLC)

The formic acid production was determined by HPLC. To test the required dimensions of the column, formic acid solution (50 % v/v in methanol) was run on C-18 columns of 10 cm and 25 cm length. The flow rate was maintained at 1.5 ml/min, injection volume 20 $\mu$ L and detection was carried out using UV at 250nm at ambient temperature.<sup>3</sup> HPLC Chromatogram of 50% formic acid in methanol solvent (Fig S7a) shows absorbance at 250nm with 9.919min retention time with high concentration whereas the chromatogram of production of formic acid (HCOOH) from CO<sub>2</sub> shows decreased retention time at 8.337min due to low concentration of produced formic acid via Se<sub>in</sub>-EY photocatalyst under solar light.

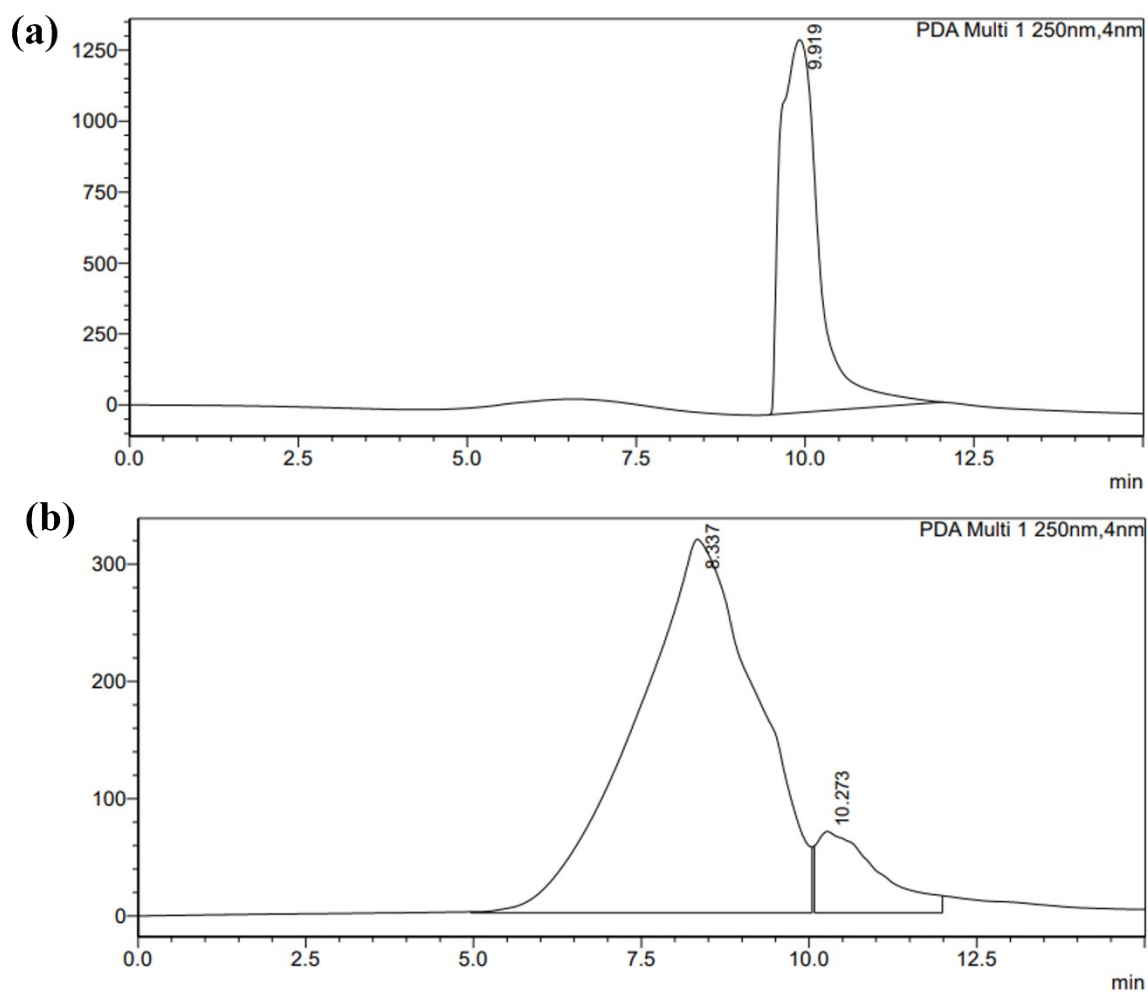

**Fig. S7** (a) HPLC Chromatogram of 50% formic acid in methanol solvent, (b) Chromatogram of production of formic acid (HCOOH) from CO<sub>2</sub> ([ $\beta$ -NAD<sup>+</sup> (1.24  $\mu$ M), AsA (1.24  $\mu$ M), Rh (0.62  $\mu$ M), and the Se<sub>in</sub>-EY (1 x 1cm<sup>2</sup>) film photocatalyst in 3.1 mL NPB (100 mM, pH 7.0), FDH (3 units)].



**10. Proton NMR spectra of formic acid produced by CO<sub>2</sub> reduction****<sup>1</sup>H-NMR** (CDCl<sub>3</sub>, 500 MHz) 8.02 (s, 1H), 7.26 (s, solvent)<sup>4</sup>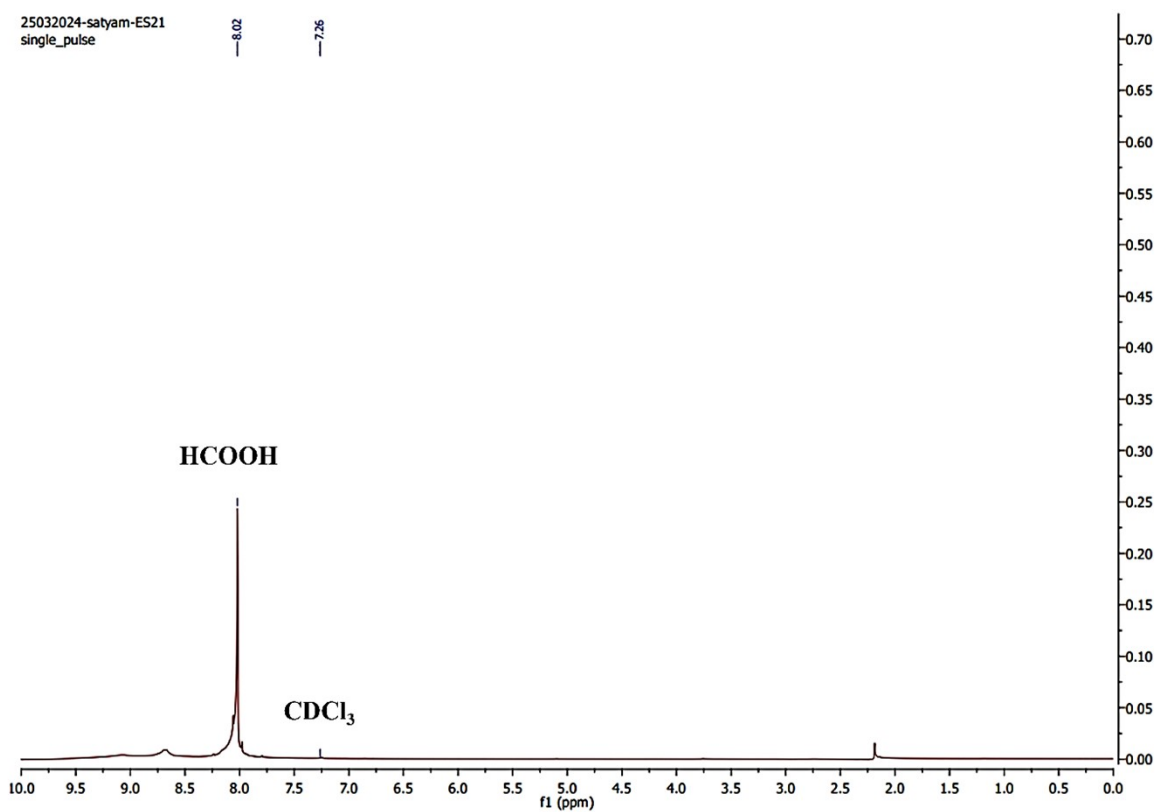**Fig. S8** <sup>1</sup>H-NMR spectra of HCOOH produced in CO<sub>2</sub> reduction process (CDCl<sub>3</sub> solvent, 500MHz).

### 11. GC-MS spectra of formic acid produced from CO<sub>2</sub> via isotope labelled experiment

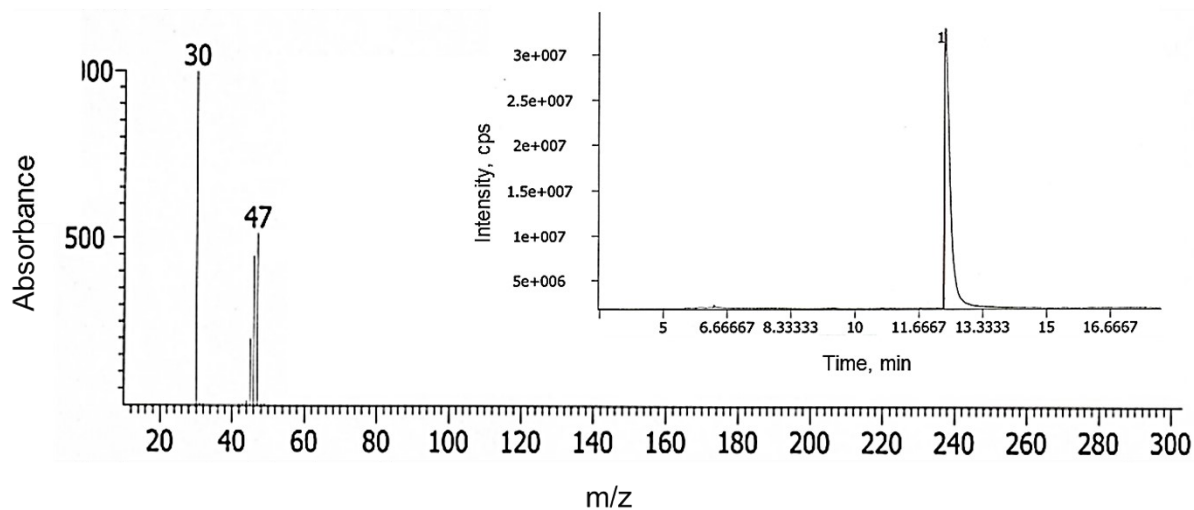

**Fig. S9** GC-MS spectra of formic acid (H<sup>13</sup>COOH) produced from <sup>13</sup>CO<sub>2</sub> via isotope labelled experiment with inset TIC chromatogram.

### 12. Plausible mechanism for CO<sub>2</sub> reduction into formic acid

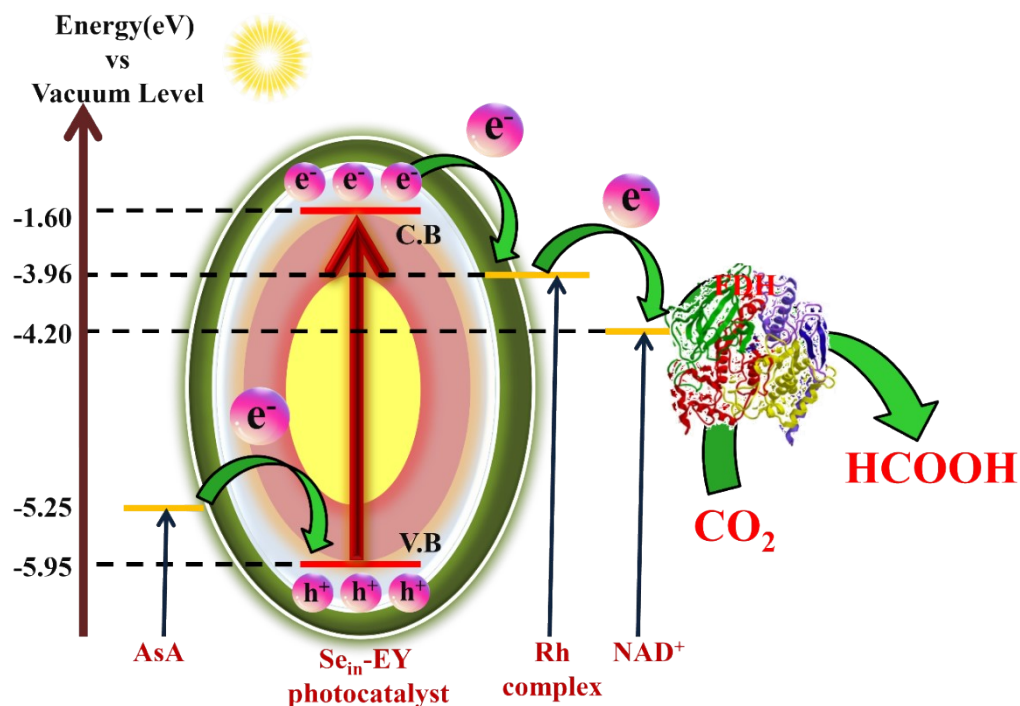

**Fig. S10** Energy flow diagram of the photocatalytic pathway for possible mechanism of carbon dioxide reduction into formic acid.

13.  $^1\text{H-NMR}$  analysis of  $\text{Se}_{\text{in}}\text{-EY}$  photocatalyst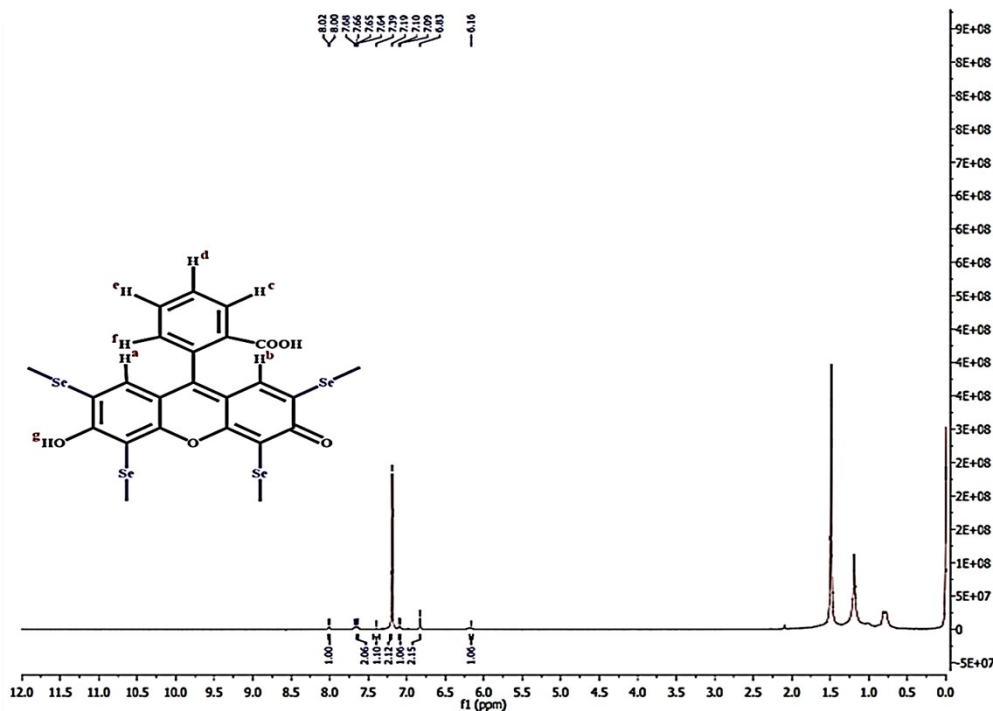

**Fig. S11**  $^1\text{H}$  NMR spectrum of  $\text{Se}_{\text{in}}\text{-EY}$  polymeric framework photocatalyst.

#### 14. Procedure for Synthesis of 3,5-diphenyl-1,2,4-thiadiazole (2a) along with $^1\text{H-NMR}$ and $^{13}\text{C-NMR}$ analysis

Benzothioamide **1a** (1.0 mmol), 3mL DMF was added in a 25 mL glass vial. A film of  $\text{Se}_{\text{in}}\text{-EY}$  ( $1 \times 1 \text{ cm}^2$ ) photocatalyst dipped in solution. The mixture was irradiated under a blue bulb (light source), stirring it for 2- 3 hours in aerobic conditions at room temperature (r.t.). A thin layer chromatography (TLC) was used for monitoring progress of the reaction. After completion of the reaction, film of photocatalyst removed from solution and added 5mL  $\text{H}_2\text{O}$  and extracted with EtOAc (15 mL). The organic layer solution separated and passed through magnesium sulphate ( $\text{MgSO}_4$ ) to trap moisture. The filtrate dried under reduced pressure and a solid crude product 3,5-diphenyl-1,2,4-thiadiazole **2a** was obtained. **Yield: 95%**

S11

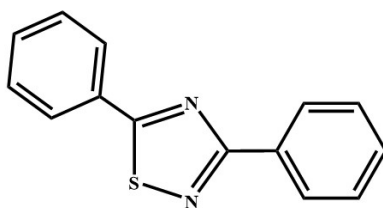

2a

$^1\text{H-NMR}$  ( $\text{CDCl}_3$ , 500 MHz) 7.84-7.86 (m, 2H), 7.48-7.51 (m, 2H), 7.37-7.41 (m, 6H).  $^{13}\text{C-NMR}$  ( $\text{CDCl}_3$ , 125 MHz) 126.83, 127.02, 127.07, 127.30, 128.60, 128.84, 132.13, 139.25, 185.9, 190.5

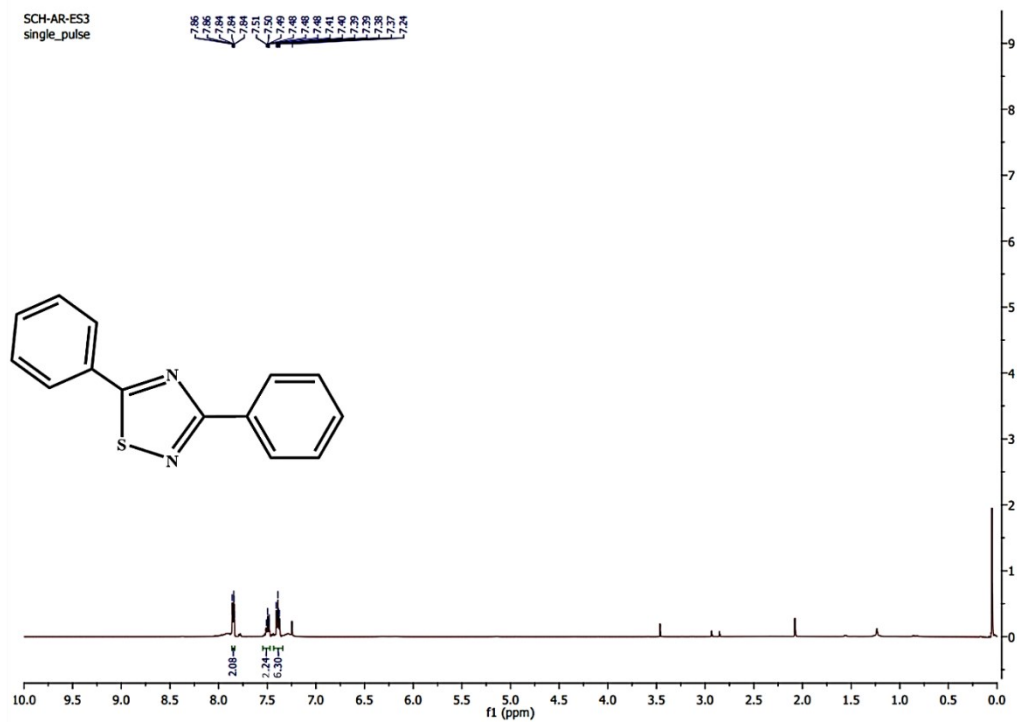

Fig.S12  $^1\text{H-NMR}$  spectra of 3,5-diphenyl-1,2,4-thiadiazole (2a).

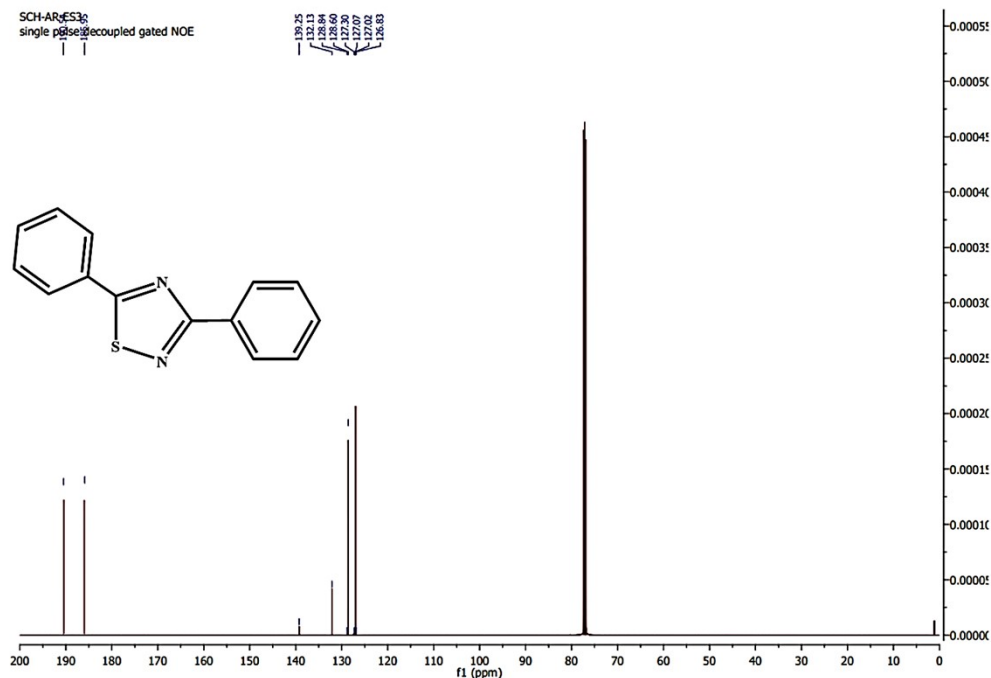

**Fig.S13**  $^{13}\text{C}$ NMR spectra of 3,5-diphenyl-1,2,4-thiadiazole (**2a**).

### 15. Procedure for Synthesis of 3,5-bis(4-methoxyphenyl)-1,2,4-thiadiazole (**2b**) along with $^1\text{H}$ -NMR

4-methoxybenzothioamide **1b** (1.0 mmol), 3mL DMF was added in a 25 mL glass vial. A film of  $\text{Se}_{\text{in}}$ -EY (1x1  $\text{cm}^2$ ) photocatalyst dipped in solution. The mixture was irradiated under a blue bulb (light source), stirring it for 2- 3 hours in aerobic conditions at room temperature (r.t.). A thin layer chromatography (TLC) was used for monitoring progress of the reaction. After completion of the reaction, film of photocatalyst removed from solution and added 5mL  $\text{H}_2\text{O}$  and extracted with EtOAc (15 mL). The organic layer solution separated and passed through magnesium sulphate ( $\text{MgSO}_4$ ) to trap moisture. The filtrate dried under reduced pressure and a solid crude product 3,5-bis(4-methoxyphenyl)-1,2,4-thiadiazole **2b** was obtained. **Yield: 96%**

S13

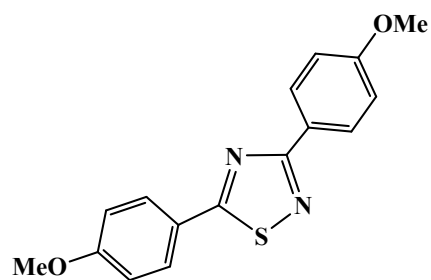

$^1\text{H-NMR}$  ( $\text{CDCl}_3$ , 500 MHz): 7.88-7.91 (d, 2H), 7.76-7.78 (d, 2H), 6.88-6.94 (dd, 4H), 3.85 (s, 6H)

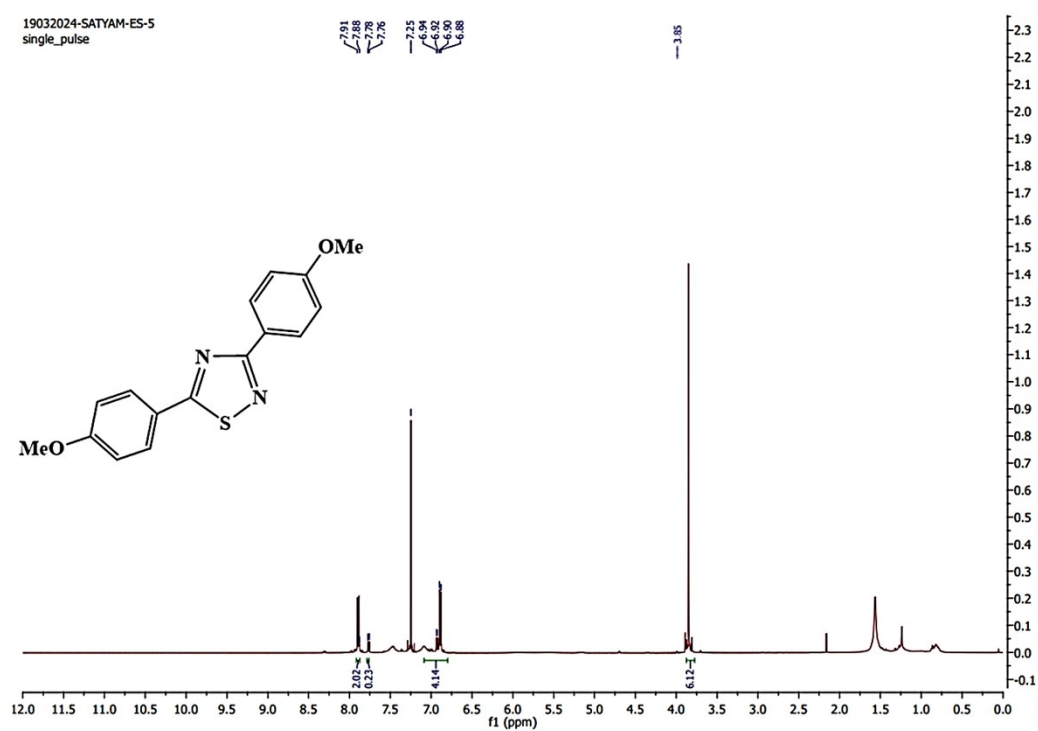

**Fig.S14**  $^1\text{H-NMR}$  spectra of 3,5-bis(4-methoxyphenyl)-1,2,4-thiadiazole (2b).

**16. Procedure for Synthesis of 3,5-bis(4-chlorophenyl)-1,2,4-thiadiazole (2c) along with <sup>1</sup>H-NMR and <sup>13</sup>C-NMR analysis**

4-chlorobenzothioamide **1c** (1.0 mmol), 3mL DMF was added in a 25 mL glass vial. A film of Se<sub>in</sub>-EY (1x1 cm<sup>2</sup>) photocatalyst dipped in solution. The mixture was irradiated under a blue bulb (light source), stirring it for 2- 3 hours in aerobic conditions at room temperature (r.t.). A thin layer chromatography (TLC) was used for monitoring progress of the reaction. After completion of the reaction, film of photocatalyst removed from solution and added 5mL H<sub>2</sub>O and extracted with EtOAc (15 mL). The organic layer solution separated and passed through magnesium sulphate (MgSO<sub>4</sub>) to trap moisture. The filtrate dried under reduced pressure and a solid crude product 3,5-bis(4-chlorophenyl)-1,2,4-thiadiazole **2c** was obtained. **Yield: 96%**

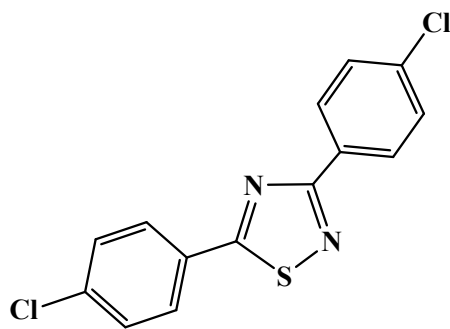**2c**

<sup>1</sup>H-NMR (CDCl<sub>3</sub>, 500 MHz) 7.79-7.80 (d, 2H), 7.71–7.73 (d, 2H), 7.34 -7. 41 (dd, 4H), 3.46(s,1H). <sup>13</sup>C-NMR (CDCl<sub>3</sub>, 125 MHz) 128.01, 128.06,127.95, 127.96, 129.1, 129.2,133.12, 173.16, 188.27

## S15

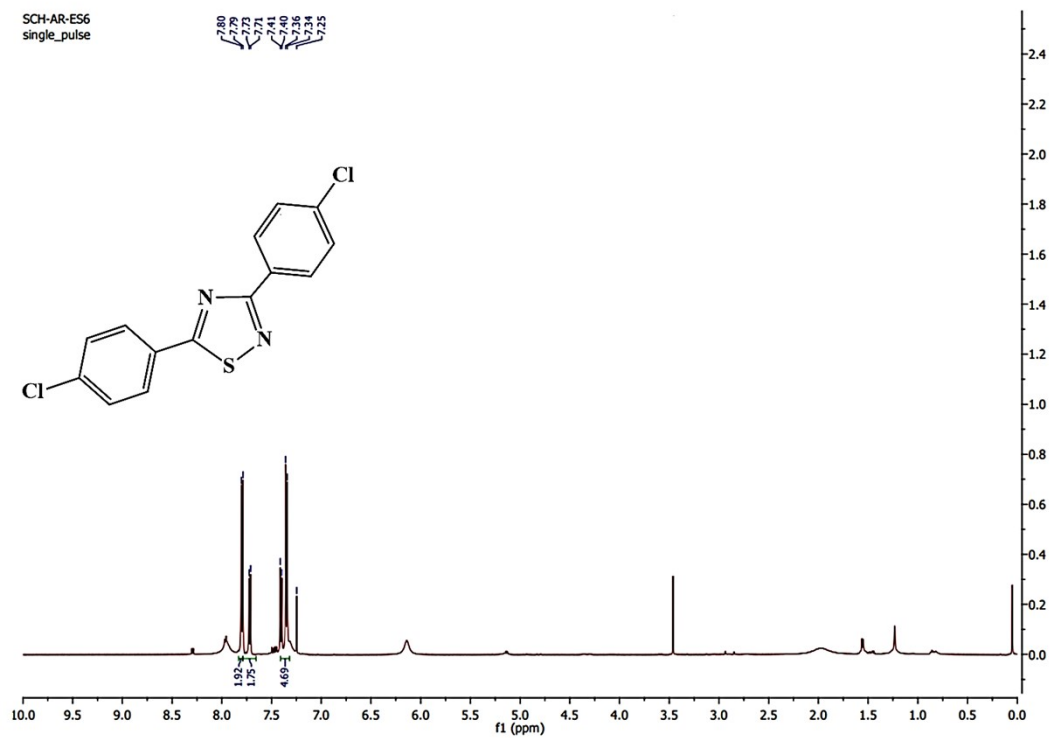

Fig.S15  $^1\text{H}$ NMR spectra of 3,5-bis(4-chlorophenyl)-1,2,4-thiadiazole (2c).

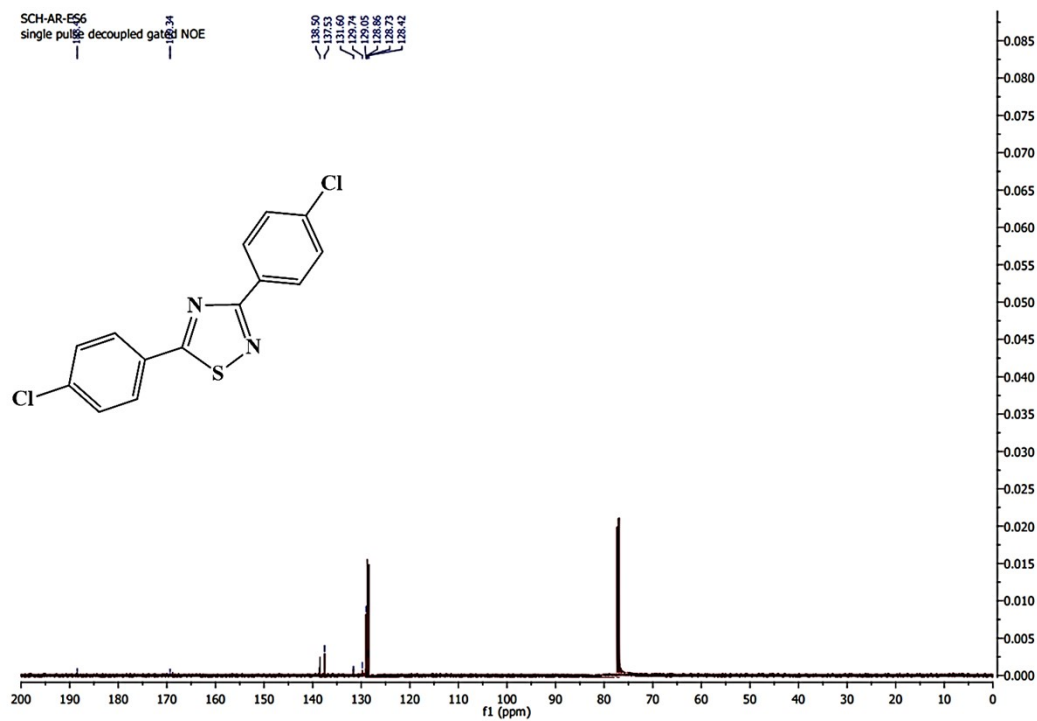

Fig.S16  $^{13}\text{C}$ NMR spectra of 3,5-bis(4-chlorophenyl)-1,2,4-thiadiazole (2c).



**17. Procedure for Synthesis of 4,4'-(1,2,4-thiadiazole-3,5-diyl) diphenol (2d)**

4-hydroxybenzothioamide **1d** (1.0 mmol), 3mL DMF was added in a 25 mL glass vial. A film of Se<sub>in</sub>-EY (1x1 cm<sup>2</sup>) photocatalyst dipped in solution. The mixture was irradiated under a blue bulb (light source), stirring it for 2- 3 hours in aerobic conditions at room temperature (r.t.). A thin layer chromatography (TLC) was used for monitoring progress of the reaction. After completion of the reaction, film of photocatalyst removed from solution and added 5mL H<sub>2</sub>O and extracted with EtOAc (15 mL). The organic layer solution separated and passed through magnesium sulphate (MgSO<sub>4</sub>) to trap moisture. The filtrate dried under reduced pressure and a solid crude product 4,4'-(1,2,4-thiadiazole-3,5-diyl) diphenol **2d** was obtained. **Yield: 98.6%**

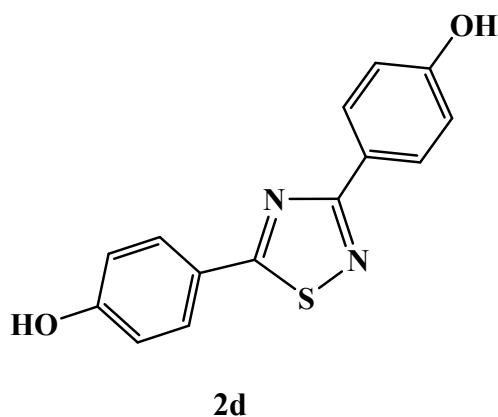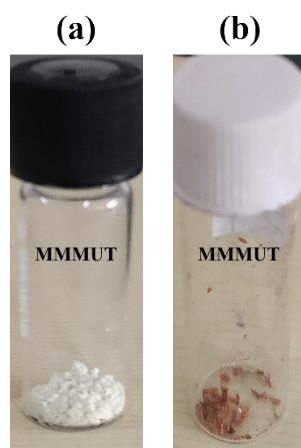

**Fig. S17** Image of (a) 4-hydroxybenzothioamide (light yellow solid) (b) 4,4'-(1,2,4-thiadiazole-3,5-diyl) diphenol (light brown solid).

**18. Procedure for Synthesis of 3,5-di(pyridin-4-yl)-1,2,4-thiadiazole (2e)**

4-pyridine-4-carbothioamide **1e** (1.0 mmol), 3mL DMF was added in a 25 mL glass vial. A film of Se<sub>in</sub>-EY (1x1 cm<sup>2</sup>) photocatalyst dipped in solution. The mixture was irradiated under a blue bulb (light source), stirring it for 2- 3 hours in aerobic conditions at room temperature (r.t.). A thin layer chromatography (TLC) was used for monitoring progress of the reaction. After completion of the reaction, film of photocatalyst removed from solution and added 5mL H<sub>2</sub>O and extracted with EtOAc (15 mL). The organic layer solution separated and passed through magnesium sulphate (MgSO<sub>4</sub>) to trap moisture. The filtrate dried under reduced pressure and a solid crude product 3,5-di(pyridin-4-yl)-1,2,4-thiadiazole **2e** was obtained.

**Yield: 92%**

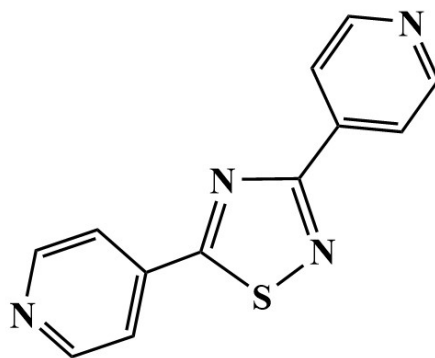

**2e**

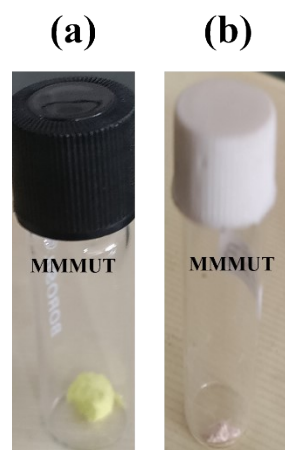

**Fig. S18** Image of (a) 4-pyridine-4-carbothioamide (yellow solid) (b) 3,5-di(pyridin-4-yl)-1,2,4-thiadiazole (light pink).

## References:

- 1 S. H. Lee, D. H. Nam, J. H. Kim, J.-O. Baeg, C. B. Park, Eosin Y-Sensitized Artificial Photosynthesis by Highly Efficient Visible-Light-Driven Regeneration of Nicotinamide Cofactor, *Chem Bio Chem*, 2009, 10, 1621-1624.
- 2 Okuom, M. O., Wilson, M. V., Jackson, A., & Holmes, A. E. (2013). Intermolecular Interactions between Eosin Y and Caffeine Using 1 H-NMR Spectroscopy. *International journal of spectroscopy*, 2013.
- 3 P. Singh, R. K. Yadav, C. Singh, S. Chaubey, S. Singh, A. P. Singh, J. O. K. Baeg, T. W. Kim and D. Gulzhian, *Sustain. Energy Fuels*, 2022, 6, 2223–2232.
- 4 J. Chung, J. Koh, E.-H. Kim, S. I. Woo and others, *Phys. Chem. Chem. Phys.*, 2016, 18, 6252–6258.
- 5 Y.-N. Gong, W. Zhong, Y. Li, Y. Qiu, L. Zheng, J. Jiang and H.-L. Jiang, *J. Am. Chem. Soc.*, 2020, 142, 16723–16731.
- 6 J. S. Lee, D. H. Nam, S. K. Kuk and C. B. Park, *Chem. Eur. J.*, 2014, 20, 3584–3588.
- 7 C. B. Park, S. H. Lee, E. Subramanian, B. B. Kale, S. M. Lee and J.-O. Baeg, *Chem. Commun.*, 2008, 5423–5425.
- 8 D. H. Nam, S. H. Lee and C. B. Park, *Small*, 2010, 6, 922–926.
- 9 K. Iizuka, T. Wato, Y. Miseki, K. Saito, A. Kudo, A. Ag and A. Ti, *J. Am. Chem. Soc.*, 2011, 15, 20863–20868.
- 10 R. Kuriki, K. Sekizawa, O. Ishitani and K. Maeda, *Ang. Chem. Int. Edition*, 2015, 54, 2406-2409.
- 11 S. K. Kuk, K. Gopinath, R. K. Singh, T.-D. Kim, Y. Lee, W. S. Choi, J.-K. Lee and C. B. Park, *ACS Catal.*, 2019, 9, 5584–5589.
- 12 J. W. Ko, W. S. Choi, J. Kim, S. K. Kuk, S. H. Lee and C. B. Park, *Biomacromolecules*, 2017, 18, 3551–3556.
- 13 X. Zhang, P. Yang, H. S. Chen and others, *Chem. Eng. J.*, 2024, 479, 147609.
- 14 X. Zhang, H. S. Chen, P. Yang and others, *Nano Energy*, 2024, 120, 109160.

- 15 X. Zhang and P. Yang, *Carbon N. Y.*, 2023, 118584.
- 16 X. Zhang, K. Zhu, C. Xie and P. Yang, *Carbon N. Y.*, 2024, 220, 118884.
- 17 X. Zhang, K. Matras-Postolek, P. Yang and others, *Carbon N. Y.*, 2023, 214, 118337.
- 18 T. Song, X. Zhang, K. Matras-Postolek and P. Yang, *Carbon N. Y.*, 2023, 202, 378–388.
- 19 D. Cheng, R. Luo, W. Zheng and J. Yan, *Synth. Commun.*, 2012, 42, 2007–2013.
- 20 V. P. Srivastava, A. K. Yadav and L. D. S. Yadav, *Synlett*, 2013, 24, 465–470.
- 21 S. Choudhury, J. Baeg, N. Park and R. K. Yadav, 2014, 4389–4400.
- 22 F. Hollmann and A. Schmid, *Biocatal. Biotransformation*, 2004, 22, 63–88.
- 23 W. Zhao, Z. Wu, Z. Fan and S. Xiang, *J. Liq. Chromatogr. \& Relat. Technol.*, 2018, 41, 481–488.
- 24 R. K. Yadav, A. Kumar, N.-J. Park, K.-J. Kong and J.-O. Baeg, *J. Mater. Chem. A*, 2016, 4, 9413–9418.
- 25 L. Fan, C. Xia, P. Zhu, Y. Lu and H. Wang, *Nat. Commun.*, 2020, 11, 1–22.
- 26 R. K. Yadav, J. O. Baeg, A. Kumar, K. J. Kong, G. H. Oh and N. J. Park, *J. Mater. Chem. A*, 2014, 2, 5068–5076
- 27 K. Sharma, R. K. Yadav, S. Singh, C. Singh, R. Shahin, K. Kumar, R. K. Verma, D. K. Dwivedi, J.-O. Baeg and N. K. Gupta, *Mol. Catal.*, 2023, 548, 113379.
- 28 H. C. Lo and R. H. Fish, *Angew. Chemie*, 2002, 114, 496–499.
- 29 R. K. Yadav, J. O. Lee, A. Kumar, N. J. Park, D. Yadav, J. Y. Kim and J. O. Baeg, *Sci. Rep.*, 2018, 8, 1–10.
